# Supplementary material
Source: publisher figshare collection journal article supplement (https://acs.figshare.com/ndownloader/files/3623013)
Supplement: Supplementary file 1 [file 3623013]

# Salt-Induced Universal Slowing Down of the Short-Time Self-Diffusion of a Globular Protein in Aqueous Solution

## Supporting Information

**Marco Grimaldo,<sup>a,b</sup> Felix Roosen-Runge,<sup>a</sup> Marcus Hennig,<sup>a,b</sup> Fabio Zanini,<sup>b,f</sup> Fajun Zhang,<sup>b</sup> Michaela Zamponi,<sup>c,d</sup> Niina Jalarvo,<sup>c,e</sup> Frank Schreiber,<sup>b</sup> Tilo Seydel<sup>\*a</sup>**

<sup>a</sup> *Institut Max von Laue - Paul Langevin (ILL), CS 20156, F-38042 Grenoble, France*

<sup>b</sup> *Institut für Angewandte Physik, Universität Tübingen, D-72076 Tübingen, Germany*

<sup>c</sup> *Jülich Centre for Neutron Science (JCNS), Forschungszentrum Jülich GmbH, D-52425 Jülich, Germany*

<sup>d</sup> *JCNS Outstation at the MLZ, Lichtenbergstraße 1, D-85747 Garching, Germany*

<sup>e</sup> *Chemical and Engineering Materials Division, Neutron Sciences Directorate, and JCNS Outstation at the Spallation Neutron Source (SNS), Oak Ridge National Laboratory, Oak Ridge, TN 37831, USA*

<sup>f</sup> *Present address: Max-Planck Institute for Developmental Biology, Spemannstraße 35, D-72076 Tübingen, Germany*

<sup>\*</sup> *E-mail: seydel@ill.eu*

## 1 Amplitudes of density fluctuations

Here we discuss a hypothetical picture of cluster formation via dynamic density fluctuations. The increase of attractive interactions between proteins due to bound  $Y^{3+}$  ions on the protein surface enhances fluctuations of the local volume fraction  $\varphi$  and thus leads to a density distribution  $G(\varphi)$ . Fluctuations in  $\varphi$  decrease the averaged apparent self-diffusion coefficient throughout the sample, since most proteins experience a denser packing.

The average diffusion coefficient can be written as:

$$D_{av} = D_0 \int_0^{\phi^{\max}} G(\varphi) \varphi \beta(\varphi) d\varphi, \quad (1)$$

where  $G(\varphi)$  is the probability density function of the local volume fraction  $\varphi$ ,  $\phi^{\max}$  is the maximum packing fraction,  $D_0$  represents the dilute limit diffusion coefficient of a protein and  $\beta(\varphi)$  is the theoretical reduced diffusion coefficient, such as that by Tokuyama and Oppenheim<sup>1</sup>.

We could not reproduce the experimental data assuming a unimodal probability distribution of local volume fractions. However, some well-separated bimodal distributions could explain the damping of the dynamics as e.g. in the limiting case of a distribution consisting of two delta functions

$$G(\varphi) = \delta(\varphi - (\phi - A)) + \delta(\varphi - (\phi + A)),$$

corresponding to square-wave-like fluctuations with an amplitude  $A$  around the average volume fraction  $\phi$  (cf. Figure 1).

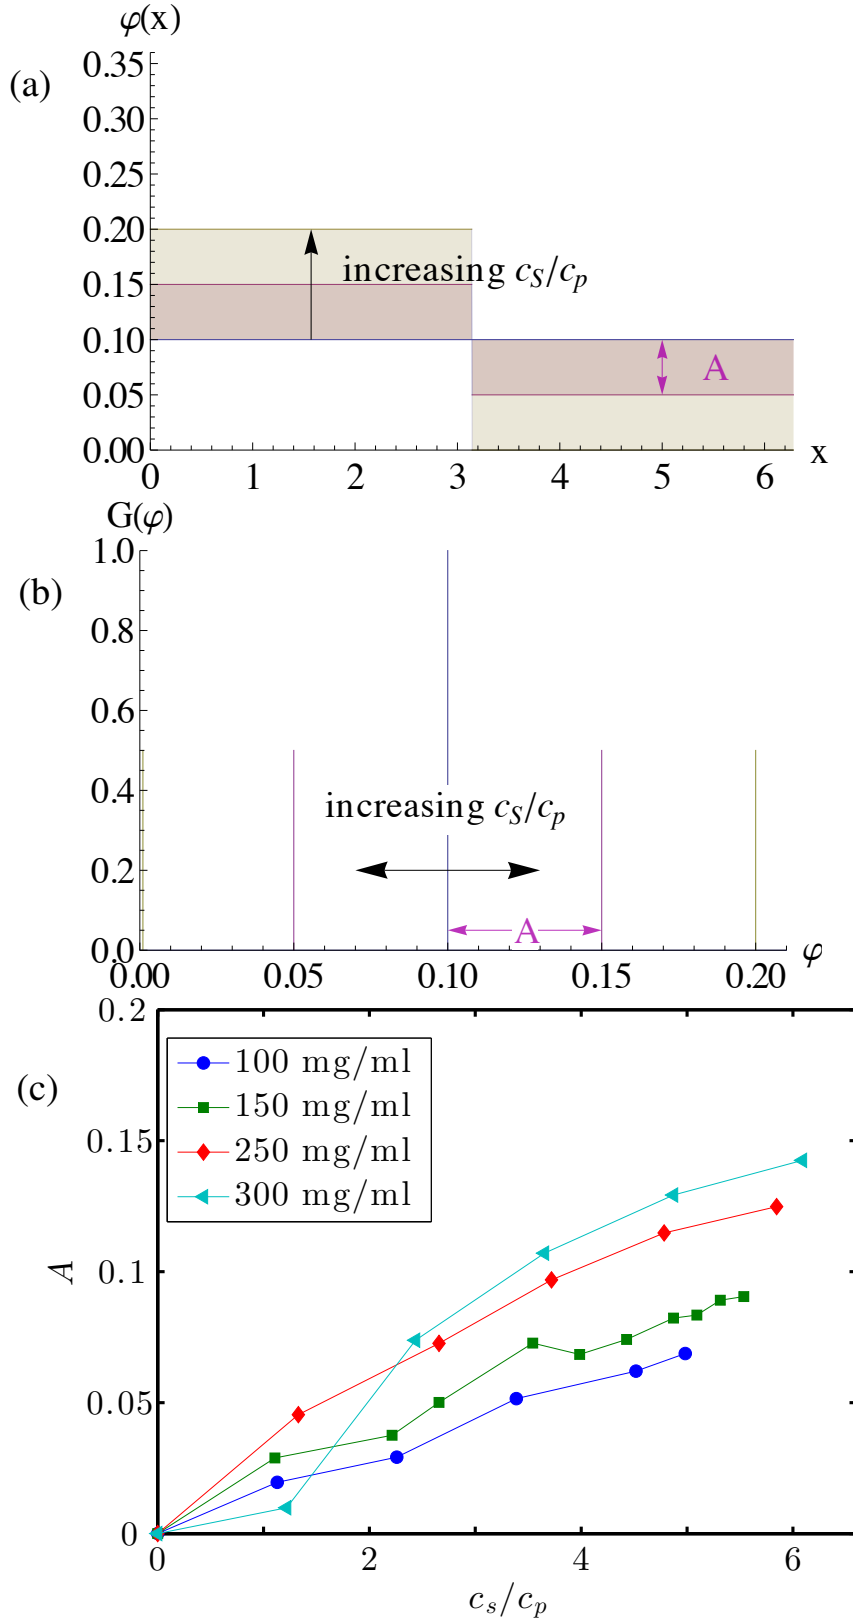

**Figure 1** (a) Local density  $\phi(x)$  as a function of the position  $x$  for a square-well-like fluctuation. Increasing salt concentration  $c_s/c_p$  increases the amplitude  $A$  of the fluctuation. (b) Probability density  $G(\phi)$  of local volume fractions  $\phi$  as a function of  $\phi$ , in the limiting case of Delta-functions (corresponding to the spatial profile shown in (a)). With increasing  $c_s/c_p$ ,  $G(\phi)$  evolves from a single peak to two peaks at distance  $A$  from the average volume fraction  $\phi$ . (c) Amplitude  $A$  of density fluctuations as a function of  $c_s/c_p$  obtained from the fit of experimental data under the assumption of square-well-like density fluctuations.

At this point, two aspects seem difficult to reconcile with a physical explanation along this scenario: (i) There is no obvious physical reason for a well-separated bimodal distribution  $G(\phi)$  away from a phase separation. (ii) There is no obvious physical reason why density fluctuations should produce a universal scaling, since this implies a very specific relation between the fluctuation amplitude and the overall protein and salt concentration (see Figure 1(c)).

## 2 Subtraction of the signal of the empty sample holder with the Paalman-Pings coefficients

In order to remove from the spectra the contribution of the sample holder, the Paalman-Pings coefficients, accounting for the  $q$ -dependent absorption of neutrons by the sample and the cell walls, have been used<sup>2</sup>. The scattering intensity  $I^s$  of the sample without contribution of the empty cell is

$$I^s(\mathbf{q}, \omega) = \alpha_{sc}(\mathbf{q}) I_{sc}^{sc}(\mathbf{q}, \omega) - \beta_{sc}(\mathbf{q}) I_c^c(\mathbf{q}, \omega), \quad (2)$$

where  $I_{sc}^{sc}$  represents the scattering intensity after scattering and absorption from both the sample and the cell and  $I_c^c$  depicts the scattering intensity after scattering and absorption from the cell only.  $\alpha$  and  $\beta$  are defined as follows:

$$\begin{aligned} \alpha_{sc} &= \frac{1}{A_{sc}^s} \\ \beta_{sc} &= \frac{1}{A_{sc}^s} \frac{A_{sc}^c}{A_c^c}. \end{aligned} \quad (3)$$

Therein  $A_{sc}^s, A_{sc}^c, A_c^c$  denote the  $q$  dependent cylindrical absorption factors called Paalman-Pings coefficients. They are in turn defined as the integral

$$A_{\Sigma}^V(\mathbf{q}) = \frac{1}{V} \int_V \exp \left[ - \int_{\gamma(\mathbf{x})} \Sigma(\mathbf{x}') ds(\mathbf{x}') \right] d^3\mathbf{x}, \quad (4)$$

where  $V$  denotes the scattering volume (either of the sample, or of the cell),  $\gamma$  indicates the path of a scattered neutron,  $\Sigma(\mathbf{x})$  is the linear attenuation coefficient at position  $\mathbf{x}$  and  $ds(\mathbf{x})$  depicts the infinitesimal line element of the line integral. The values of the attenuation coefficients have been calculated using the National Institute of Standards and Technology (NIST) utility<sup>3</sup>. The density  $\rho$  used in the calculation of the linear attenuation coefficient of the BSA solutions was obtained for a concentration  $c_p = 200\text{mg/ml}$  as follows:

$$\rho = (1 - \phi) \rho_{\text{D}_2\text{O}} + \phi \rho_{\text{BSA}}, \quad (5)$$

where  $\phi = 0.136$  is the protein volume fraction, without hydration shell and  $\rho_{\text{BSA}} = 1.36\text{g cm}^{-3}$ . With  $\rho_{\text{D}_2\text{O}} = 1.1050\text{g cm}^{-3}$ , the density of the solution results  $\rho = 1.14\text{g cm}^{-3}$ . This value has been used for the calculation of the Paalman-Pings coefficients, which were used for all the samples, since the variation in density of the investigated solutions results in variations of the linear attenuation coefficient of the order of a few percent and thus of acceptable magnitude.

## 3 Number density of $n$ -clusters

Figure 2 depicts the number density  $\rho_n^*$  of the  $n$ -clusters calculated using the result for the bonding probability  $p_b$  from the main article.

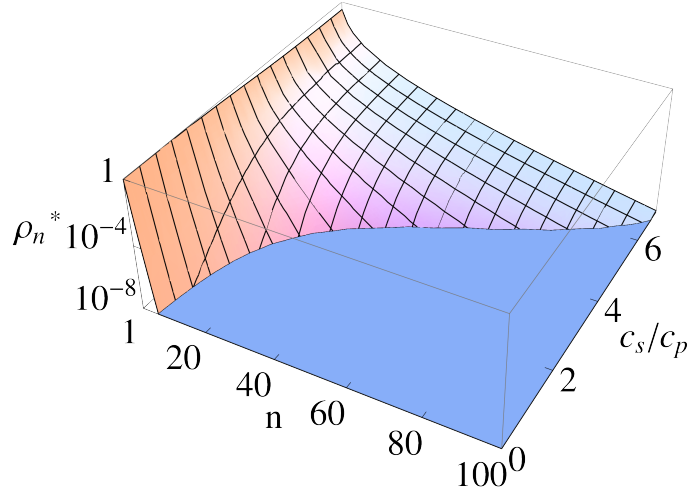

**Figure 2** Number density  $\rho_n^*$  of  $n$ -clusters according to equation (3) of the main article computed using the bonding probability  $p_b$  obtained from the experiment (figure 2 of the main article), plotted versus the number  $n$  of proteins per cluster and the ratio of the salt concentration  $c_s$  and protein concentration  $c_p$ .

## References

- [1] M. Tokuyama and I. Oppenheim, *Phys. Rev. E*, 1994, **50**, 16–19.
- [2] H. Paalman and C. Pings, *J. Appl. Phys.*, 1962, **33**, 2635–2639.
- [3] NIST, <http://www.ncnr.nist.gov/resources/sldcalc.html>.
